# Supplementary material for: Efficient green fluorescent organic light-emitting diodes with extended lifetimes by exploiting an iridium complex as a sensitizer
Source: Royal Society of Chemistry journal article supplement (doi:10.1039/d1tc03962h), 2021-01-01
Supplement: d1tc03962h1.pdf [file d1tc03962h1.pdf]

## Supplementary Data

Efficient Green Fluorescent Organic Light-Emitting Diodes with Extended Lifetime  
by Exploiting Iridium Complex as Sensitizer

Rongzhen Cui <sup>a, b</sup>, Liang Zhou <sup>b, \*</sup>, Xuesen Zhao <sup>b</sup>, Qilin Wang <sup>b</sup>, Fenggang Liu <sup>a, \*</sup>, and  
Jiahai Wang <sup>a, \*</sup>

*<sup>a</sup> School of Chemistry and Chemical Engineering, Guangzhou University, Guangzhou  
510006, People's Republic of China*

*<sup>b</sup> State Key Laboratory of Rare Earth Resource Utilization, Changchun Institute of  
Applied Chemistry, Chinese Academy of Sciences, Changchun 130022, People's  
Republic of China*

---

\* <sup>a</sup> Correspondence to: School of Chemistry and Chemical Engineering, Guangzhou University, Guangzhou 510006, People's Republic of China. Tel.: +86 18816801579.

*E-mail address:* liufg6@gzh.edu.cn (F. Liu), jiahaiwang@gzh.edu.cn (J. Wang).

\* <sup>b</sup> Correspondence to: State Key Laboratory of Rare Earth Resource Utilization, Changchun Institute of Applied Chemistry, Chinese Academy of Sciences, Changchun 130022, People's Republic of China. *E-mail address:* zhoul@ciac.ac.cn (L. Zhou).

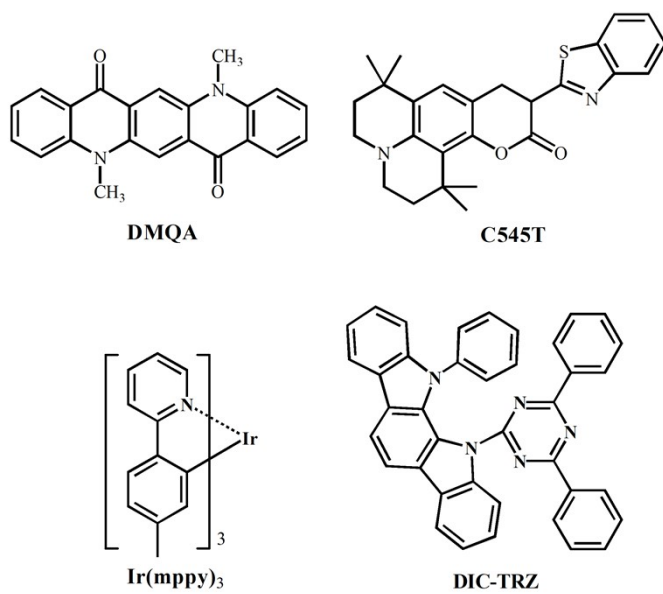

Fig. S1 Molecular structures of DMQA, C545T, Ir(mppy)<sub>3</sub> and DIC-TRZ.

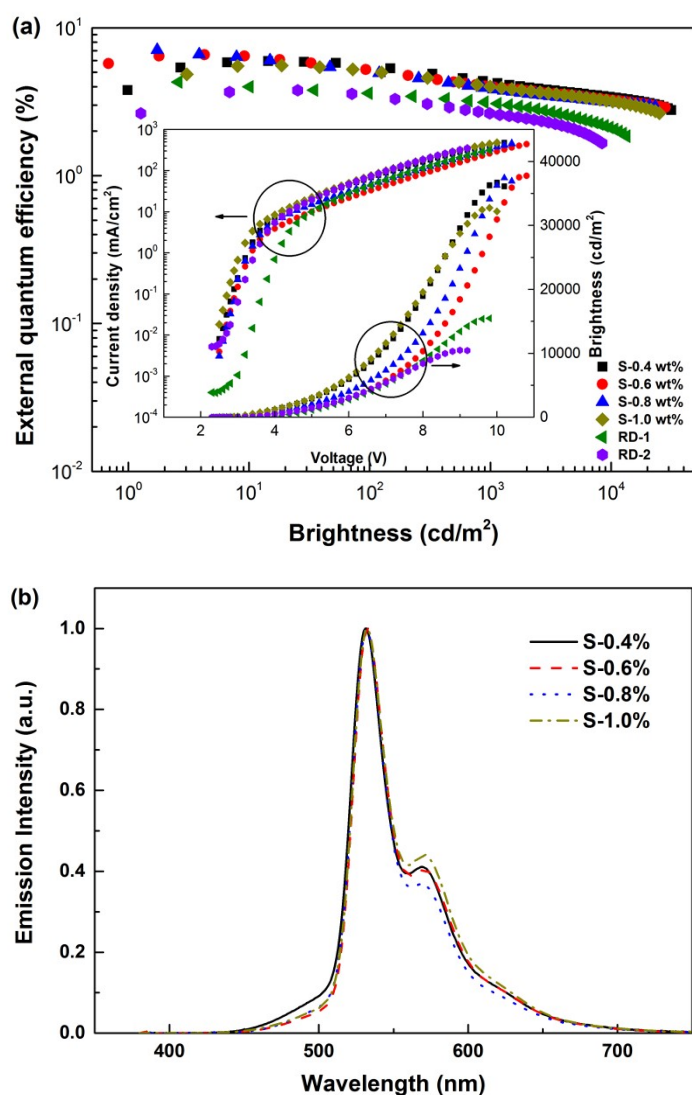

Fig. S2 (a) EL efficiency-current density ( $\eta$ - $J$ ) characteristics of reference devices and single-EML devices with DMQA at different doping concentrations. Inset: Current density-brightness-voltage ( $J$ - $B$ - $V$ ) characteristics of reference devices and single-EML devices with DMQA at different doping concentrations. (b) Normalized EL spectra of single-EML devices with DMQA at different doping concentrations.

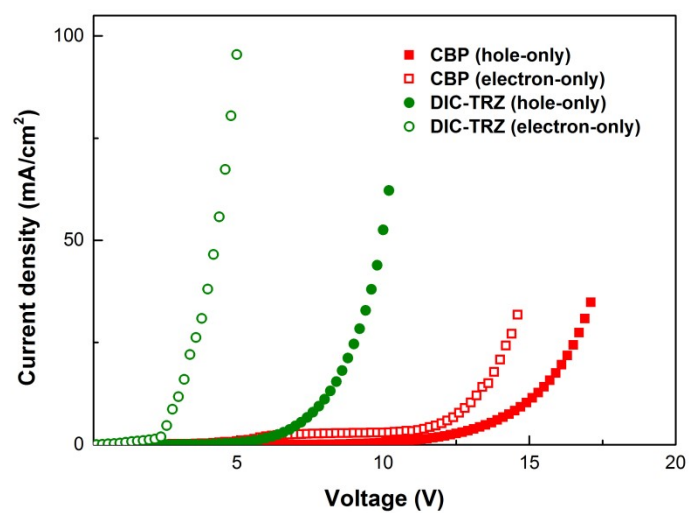

Fig. S3 Current density-voltage ( $J$ - $V$ ) characteristics of hole- and electron-only devices based on DIC-TRZ and CBP.

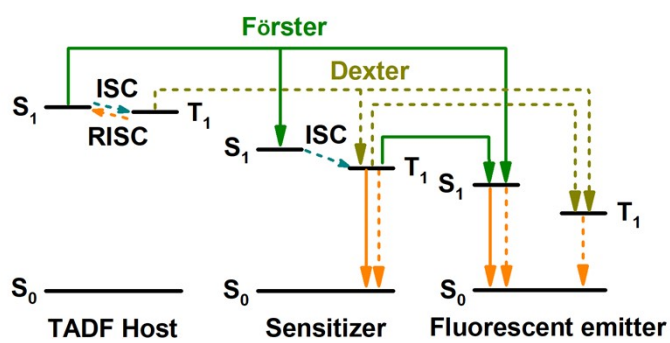

Fig. S4 Schematic illustration of energy transfer process.
